# Supplementary material for: Pressure-induced structural transitions, alloying and superconductivity in topological insulators Bi2Te2Se and Bi2Se2Te
Source: Royal Society of Chemistry journal article supplement (doi:10.1039/d2dt01545e), 2022-01-01
Supplement: d2dt01545e1.pdf [file d2dt01545e1.pdf]

# **The pressure-induced structural transitions, alloying and superconductivity in topological insulators $\text{Bi}_2\text{Te}_2\text{Se}$ and $\text{Bi}_2\text{Se}_2\text{Te}$**

Hu Cheng<sup>1, \*</sup>, Yixuan Xu<sup>1,2</sup>, Xuefeng Zhou<sup>3</sup>, Yu Gong<sup>1</sup>, Dongliang Yang<sup>1</sup>, Xiaodong Li<sup>1</sup>,  
Yanchun Li<sup>1, \*</sup>

<sup>1</sup>*Multidiscipline Research Center, Institute of High Energy Physics, Chinese Academy of Science, Beijing 100049, China*

<sup>2</sup>*University of Chinese Academy of Sciences, Beijing 100049, China*

<sup>3</sup>*Department of Physics, Southern University of Science and Technology, Shenzhen 518055, China*

**Fig. S1** Comparison of experimental and simulated XRD patterns for  $\text{Bi}_2\text{Te}_2\text{Se}$  at 47.3 GPa.

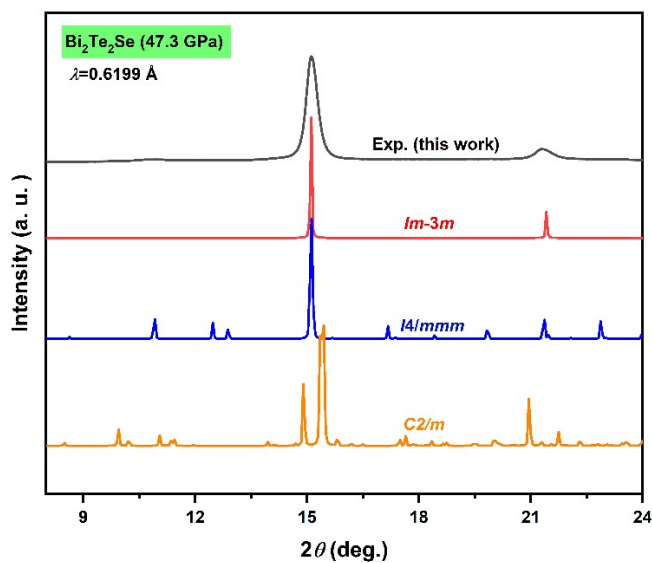

**Fig. S2** Experimental and fitted (red line) XRD patterns for phase IV of  $\text{Bi}_2\text{Se}_2\text{Te}$  at 36.3 GPa, which are simulated by using the (a) *C2/m* (LeBail fitting), (b) BCT (Rietveld refinement) and (c) disordered BCC structures (Rietveld refinement), respectively.

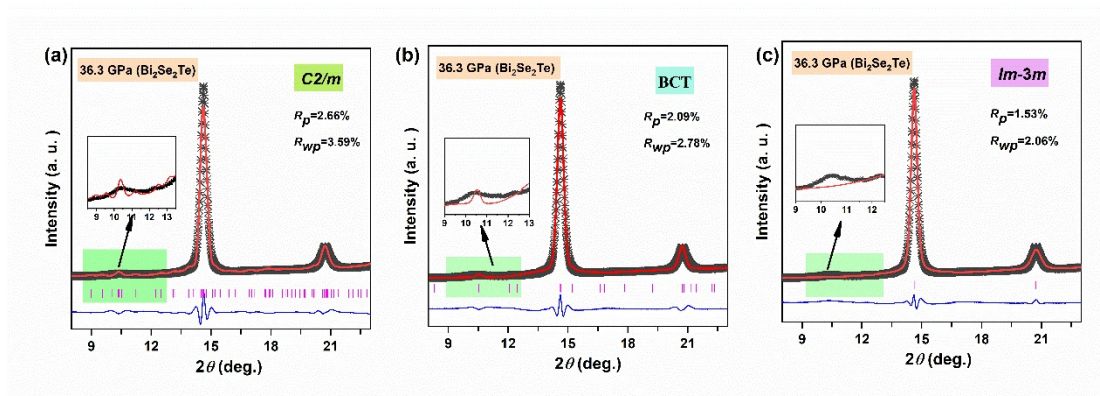

**Table S1.** Lattice parameters and atomic coordinates of phase I and II of Bi<sub>2</sub>Se<sub>2</sub>Te and Bi<sub>2</sub>Te<sub>2</sub>Se, respectively.

| Lattice params                                                           | atoms    | x          | y | z          |
|--------------------------------------------------------------------------|----------|------------|---|------------|
| Phase I ( <i>R-3m</i> ) 0.3 GPa for Bi <sub>2</sub> Te <sub>2</sub> Se   |          |            |   |            |
| $a=4.2315(5)$ Å                                                          | Bi1 (6c) | 0          | 0 | 0.3988(6)  |
| $c=29.4592(1)$ Å                                                         | Te1 (6c) | 0          | 0 | 0.1972(1)  |
|                                                                          | Se3 (3a) | 0          | 0 | 0          |
| Phase II ( <i>C2/m</i> ) 12.0 GPa for Bi <sub>2</sub> Te <sub>2</sub> Se |          |            |   |            |
|                                                                          | Bi1 (4i) | 0.3149(19) | 0 | 0.3351(19) |
| $a=14.1857(14)$ Å                                                        | Bi2 (4i) | 0.4957(20) | 0 | 0.2706(18) |
| $b=3.8780(11)$                                                           | Te1 (4i) | 0.0610(32) | 0 | 0.9207(27) |
| $c=16.8840(22)$ Å                                                        | Te2 (4i) | 0.8601(27) | 0 | 0.5128(23) |
| $\beta=147.504(2)$ °                                                     | Se1 (4i) | 0.6590(48) | 0 | 0.0689(31) |
| Phase I ( <i>R-3m</i> ) 0.4 GPa for Bi <sub>2</sub> Se <sub>2</sub> Te   |          |            |   |            |
| $a=4.2026(2)$ Å                                                          | Bi1 (6c) | 0          | 0 | 0.3973(4)  |
| $c=29.1356(3)$ Å                                                         | Se1 (6c) | 0          | 0 | 0.2101(3)  |
|                                                                          | Te3 (3a) | 0          | 0 | 0          |
| Phase II ( <i>C2/m</i> ) 16.4 GPa for Bi <sub>2</sub> Se <sub>2</sub> Te |          |            |   |            |
|                                                                          | Bi1 (4i) | 0.3365(12) | 0 | 0.3047(18) |
| $a=14.1787(42)$ Å                                                        | Bi2 (4i) | 0.5063(15) | 0 | 0.2655(13) |
| $b=3.8180(37)$                                                           | Se1 (4i) | 0.1124(19) | 0 | 0.8276(22) |
| $c=16.5224(22)$ Å                                                        | Se2 (4i) | 0.8531(23) | 0 | 0.4560(34) |
| $\beta=147.936(6)$ °                                                     | Te1 (4i) | 0.7209(21) | 0 | 0.0881(18) |

**Table S2.** The unit cell results versus pressure of phase I, II and III for Bi<sub>2</sub>Te<sub>2</sub>Se *via* Le Bail fitting method.

| <b>Phase I (<i>R-3m</i>)</b> |                   |                   |                                |
|------------------------------|-------------------|-------------------|--------------------------------|
| <b><i>P</i> (GPa)</b>        | <b><i>a</i>/Å</b> | <b><i>c</i>/Å</b> | <b><i>V</i>/ Å<sup>3</sup></b> |
| 0.3                          | 4.2315(5)         | 29.4592(1)        | 456.991(3)                     |
| 1.4                          | 4.2070(1)         | 29.1635(2)        | 447.008(4)                     |
| 2.0                          | 4.1935(2)         | 28.9970(5)        | 441.608(2)                     |
| 2.6                          | 4.1815(5)         | 28.8601(4)        | 437.010(8)                     |
| 4.2                          | 4.1532(6)         | 28.6029(1)        | 427.275(7)                     |
| 5.6                          | 4.1262(3)         | 28.4408(1)        | 419.361(4)                     |
| 6.7                          | 4.1106(2)         | 28.3669(4)        | 415.101(5)                     |
| 7.6                          | 4.0962(2)         | 28.2805(2)        | 410.958(6)                     |
| 9.0                          | 4.0755(1)         | 28.1766(3)        | 405.304(2)                     |
| 10.2                         | 4.0555(6)         | 28.0905(2)        | 400.125(9)                     |

| <b>Phase II (<i>C/2m</i>)</b>  |                   |                   |                   |                            |                                |
|--------------------------------|-------------------|-------------------|-------------------|----------------------------|--------------------------------|
| <b><i>P</i> (GPa)</b>          | <b><i>a</i>/Å</b> | <b><i>b</i>/Å</b> | <b><i>c</i>/Å</b> | <b><math>\beta</math>°</b> | <b><i>V</i>/ Å<sup>3</sup></b> |
| 10.2                           | 14.3526(12)       | 3.8881(15)        | 17.0710(16)       | 147.656(1)                 | 509.661(1)                     |
| 12.0                           | 14.1857(14)       | 3.8780(11)        | 16.8840(22)       | 147.504(2)                 | 499.003(6)                     |
| 13.2                           | 14.1407(12)       | 3.8736(13)        | 16.7543(12)       | 147.368(1)                 | 494.879(6)                     |
| 15.3                           | 14.0752(16)       | 3.8681(12)        | 16.6034(33)       | 147.320(2)                 | 488.101(7)                     |
| 17.2                           | 14.0176(11)       | 3.8632(20)        | 16.4528(23)       | 147.286(1)                 | 481.522(2)                     |
| 19.5                           | 13.9856(21)       | 3.8577(24)        | 16.2586(27)       | 147.231(2)                 | 474.781(3)                     |
| <b>Phase III (<i>C/2c</i>)</b> |                   |                   |                   |                            |                                |
| 19.5                           | 9.5361(11)        | 6.4152(35)        | 9.8215(35)        | 130.450(1)                 | 457.223(8)                     |
| 24.8                           | 9.3861(23)        | 6.3150(21)        | 9.7253(24)        | 130.200(1)                 | 440.290(6)                     |
| 28.4                           | 9.3113(21)        | 6.2658(13)        | 9.6885(37)        | 130.066(7)                 | 432.589(3)                     |
| 32.1                           | 9.2456(18)        | 6.2237(15)        | 9.6420(28)        | 130.035(8)                 | 424.801(1)                     |
| 36.7                           | 9.1782(17)        | 6.1811(26)        | 9.5934(11)        | 130.015(2)                 | 416.827(2)                     |
| 38.9                           | 9.1535(12)        | 6.1636(27)        | 9.5756(27)        | 129.995(5)                 | 413.886(7)                     |

**Table S3.** The unit cell results versus pressure of phase I and II for Bi<sub>2</sub>Se<sub>2</sub>Te via Le Bail fitting method.

| <b>Phase I (<i>R-3m</i>)</b> |                   |                   |                                |
|------------------------------|-------------------|-------------------|--------------------------------|
| <b><i>P</i> (GPa)</b>        | <b><i>a</i>/Å</b> | <b><i>c</i>/Å</b> | <b><i>V</i>/ Å<sup>3</sup></b> |
| 0.4                          | 4.2026(2)         | 29.1356(3)        | 445.647(6)                     |
| 1.8                          | 4.1779(1)         | 28.7677(2)        | 434.862(7)                     |
| 3.4                          | 4.1343(2)         | 28.3079(7)        | 419.027(8)                     |
| 5.5                          | 4.0833(3)         | 27.9014(5)        | 402.883(7)                     |
| 6.8                          | 4.0585(1)         | 27.7486(3)        | 395.825(5)                     |
| 7.9                          | 4.0361(2)         | 27.6595(6)        | 389.210(2)                     |
| 9.1                          | 4.0142(5)         | 27.5484(8)        | 384.437(7)                     |
| 10.7                         | 3.9983(9)         | 27.4208(3)        | 379.631(6)                     |

| <b>Phase II (<i>C/2m</i>)</b> |                   |                   |                   |                   |                                |
|-------------------------------|-------------------|-------------------|-------------------|-------------------|--------------------------------|
| <b><i>P</i> (GPa)</b>         | <b><i>a</i>/Å</b> | <b><i>b</i>/Å</b> | <b><i>c</i>/Å</b> | <b><i>β</i>'°</b> | <b><i>V</i>/ Å<sup>3</sup></b> |
| 10.7                          | 14.2253(52)       | 3.91652(14)       | 16.7852(17)       | 148.103(3)        | 494.136(8)                     |
| 13.2                          | 14.1988(21)       | 3.8622(27)        | 16.6192(43)       | 148.005(2)        | 482.885(4)                     |
| 16.4                          | 14.1787(42)       | 3.8180(37)        | 16.5224(22)       | 147.936(6)        | 474.822(5)                     |
| 18.9                          | 14.1681(23)       | 3.7721(18)        | 16.4178(31)       | 147.909(8)        | 466.147(8)                     |
| 23.4                          | 14.1493(28)       | 3.7045(25)        | 16.2734(22)       | 147.872(1)        | 453.505(7)                     |
| 26.8                          | 14.1339(31)       | 3.6535(43)        | 16.1748(20)       | 147.745(5)        | 445.757(5)                     |

**Table S4.** Lattice parameters and atomic coordinates of phase IV of Bi<sub>2</sub>Se<sub>2</sub>Te at 36.3 GPa, which are simulated by using the body-centered tetragonal (BCT), 9/10-fold monoclinic, and disordered body-centered cubic (*Im-3m*) structures

| Lattice params                     | atoms         | x      | y | z         |
|------------------------------------|---------------|--------|---|-----------|
| Phase IV ( <i>C2/m</i> ) 36.3 GPa  |               |        |   |           |
|                                    | Bi1 (4i)      | 0.3995 | 0 | 0.6081    |
| $a=14.7858 \text{ \AA}$            | Bi2 (4i)      | 0.1961 | 0 | 0.8060    |
| $b=4.9031 \text{ \AA}$             | Se1 (4i)      | 0.3998 | 0 | 0.1028    |
| $c=5.9465 \text{ \AA}$             | Se2 (2a)      | 0      | 0 | 0         |
| $\beta=104.809^\circ$              | Se3 (2c)      | 0      | 0 | 0.5       |
|                                    | Te (4i)       | 0.7978 | 0 | 0.6940    |
| Phase IV (BCT) 36.3 GPa            |               |        |   |           |
|                                    | Bi (4e)       | 0      | 0 | 0.4105(3) |
| $a=3.4518(5) \text{ \AA}$          | Se (4e)       | 0      | 0 | 0.2039(2) |
| $c=17.1806(8) \text{ \AA}$         | Te (2a)       | 0      | 0 | 0         |
| Phase IV ( <i>Im-3m</i> ) 36.3 GPa |               |        |   |           |
| $a=3.4298(1) \text{ \AA}$          | Bi/Te/Se (2a) | 0      | 0 | 0         |

**Table S5.** The unit cell results versus pressure of phase IV for Bi<sub>2</sub>Te<sub>2</sub>Se and Bi<sub>2</sub>Se<sub>2</sub>Te obtained from Rietveld refinements/ Le Bail fitting using different space groups.

| <b>Phase IV (<i>Im-3m</i>) of Bi<sub>2</sub>Te<sub>2</sub>Se (Rietveld method)</b> |                   |                                |                                                      |
|------------------------------------------------------------------------------------|-------------------|--------------------------------|------------------------------------------------------|
| <b><i>P</i> (GPa)</b>                                                              | <b><i>a</i>/Å</b> | <b><i>V</i>/ Å<sup>3</sup></b> | <b><i>R<sub>p</sub></i>/<i>R<sub>w</sub></i> (%)</b> |
| 24.8                                                                               | 3.4541(2)         | 41.212(3)                      | 3.12/4.55                                            |
| 28.4                                                                               | 3.4420(1)         | 40.779(4)                      | 2.79/3.86                                            |
| 32.1                                                                               | 3.4266(3)         | 40.236(8)                      | 2.62/5.25                                            |
| 36.7                                                                               | 3.4075(2)         | 39.565(5)                      | 2.52/3.60                                            |
| 38.9                                                                               | 3.3971(8)         | 39.205(4)                      | 1.59/2.64                                            |
| 42.7                                                                               | 3.3802(7)         | 38.621(6)                      | 1.43/2.32                                            |
| 45.3                                                                               | 3.3705(3)         | 38.290(1)                      | 1.65/2.58                                            |
| 47.3                                                                               | 3.3601(6)         | 37.935(1)                      | 1.76/2.38                                            |
| 50.7                                                                               | 3.3442(7)         | 37.400(2)                      | 1.25/3.05                                            |
| 55.1                                                                               | 3.3208(5)         | 36.621(3)                      | 1.03/1.93                                            |
| 60.5                                                                               | 3.2982(1)         | 35.879(1)                      | 0.94/1.46                                            |
| <b>Phase IV (<i>Im-3m</i>) of Bi<sub>2</sub>Se<sub>2</sub>Te (Rietveld method)</b> |                   |                                |                                                      |
| 26.8                                                                               | 3.4664(2)         | 41.653(3)                      | 2.57/3.95                                            |
| 30.6                                                                               | 3.4488(2)         | 41.021(7)                      | 2.49/3.73                                            |
| 32.5                                                                               | 3.4398(3)         | 40.702(4)                      | 2.32/3.41                                            |
| 36.3                                                                               | 3.4298(9)         | 40.347(1)                      | 1.53/2.06                                            |
| 37.8                                                                               | 3.4259(2)         | 40.209(2)                      | 2.53/3.72                                            |
| 41.3                                                                               | 3.4147(1)         | 39.816(5)                      | 2.15/3.26                                            |
| 46.8                                                                               | 3.3998(6)         | 39.300(6)                      | 1.74/2.36                                            |
| 49.3                                                                               | 3.3902(5)         | 38.966(5)                      | 2.07/3.08                                            |
| 52                                                                                 | 3.3794(4)         | 38.593(3)                      | 2.07/3.44                                            |
| 55.9                                                                               | 3.3663(2)         | 38.145(2)                      | 1.85/2.06                                            |
| 61.5                                                                               | 3.3446(7)         | 37.416(1)                      | 0.91/1.50                                            |
| 66.3                                                                               | 3.3317(5)         | 36.984(1)                      | 1.40/1.96                                            |

| <b>Phase IV (BCT) of Bi<sub>2</sub>Te<sub>2</sub>Se (Rietveld method)</b> |                   |                   |                                |                                                     |
|---------------------------------------------------------------------------|-------------------|-------------------|--------------------------------|-----------------------------------------------------|
| <b><i>P</i> (GPa)</b>                                                     | <b><i>a</i>/Å</b> | <b><i>c</i>/Å</b> | <b><i>V</i>/ Å<sup>3</sup></b> | <b><i>R<sub>p</sub></i>/<i>R<sub>w</sub></i>(%)</b> |
| 24.8                                                                      | 3.5295(1)         | 17.5683(5)        | 218.855(8)                     | 3.68/4.55                                           |
| 28.4                                                                      | 3.4987(2)         | 17.4054(1)        | 213.058(5)                     | 3.51/4.25                                           |
| 32.1                                                                      | 3.4737(2)         | 17.2929(7)        | 208.666(9)                     | 3.33/4.08                                           |
| 36.7                                                                      | 3.4429(6)         | 17.1711(2)        | 203.539(8)                     | 3.05/4.13                                           |
| 38.9                                                                      | 3.4133(1)         | 17.0442(5)        | 198.575(2)                     | 2.78/3.77                                           |
| 42.7                                                                      | 3.3862(8)         | 16.9230(2)        | 194.045(6)                     | 2.55/3.63                                           |
| 45.3                                                                      | 3.3757(2)         | 16.8155(8)        | 191.618(4)                     | 2.15/3.42                                           |
| 47.3                                                                      | 3.3650(6)         | 16.7283(8)        | 189.418(4)                     | 2.01/3.10                                           |
| 50.7                                                                      | 3.3440(3)         | 16.4838(1)        | 184.327(3)                     | 2.08/3.45                                           |
| 55.1                                                                      | 3.3226(4)         | 16.3796(5)        | 180.834(7)                     | 2.05/3.23                                           |
| 60.5                                                                      | 3.2880(8)         | 16.3068(4)        | 176.298(1)                     | 2.11/3.30                                           |
| <b>Phase IV (BCT) of Bi<sub>2</sub>Se<sub>2</sub>Te (Rietveld method)</b> |                   |                   |                                |                                                     |
| 26.8                                                                      | 3.4928(1)         | 17.2954(2)        | 210.997(2)                     | 4.13/5.67                                           |
| 30.6                                                                      | 3.4769(7)         | 17.2511(2)        | 208.545(7)                     | 3.88/4.35                                           |
| 32.5                                                                      | 3.4642(3)         | 17.2205(3)        | 206.657(5)                     | 3.52/4.78                                           |
| 36.3                                                                      | 3.4541(8)         | 17.1907(5)        | 205.098(7)                     | 2.09/2.78                                           |
| 37.8                                                                      | 3.4402(9)         | 17.1646(8)        | 203.142(8)                     | 3.05/4.18                                           |
| 41.3                                                                      | 3.4187(5)         | 17.1297(4)        | 200.203(3)                     | 2.55/3.67                                           |
| 46.8                                                                      | 3.3990(6)         | 17.0659(6)        | 197.165(2)                     | 2.16/3.08                                           |
| 49.3                                                                      | 3.3901(2)         | 17.0131(3)        | 195.527(1)                     | 2.55/3.56                                           |
| 52                                                                        | 3.3807(4)         | 16.9511(2)        | 193.736(2)                     | 2.18/3.27                                           |
| 55.9                                                                      | 3.3601(5)         | 16.8891(1)        | 190.682(5)                     | 2.05/3.13                                           |
| 61.5                                                                      | 3.3398(6)         | 16.8070(5)        | 187.469(4)                     | 2.54/3.81                                           |
| 66.3                                                                      | 3.3119(7)         | 16.7158(5)        | 183.350(7)                     | 2.17/3.42                                           |



| <b>Phase IV (<i>C/2m</i>) of Bi<sub>2</sub>Te<sub>2</sub>Se (Le Bail fitting)</b> |                   |                   |                   |                             |                                |                         |
|-----------------------------------------------------------------------------------|-------------------|-------------------|-------------------|-----------------------------|--------------------------------|-------------------------|
| <b><i>P</i> (GPa)</b>                                                             | <b><i>a</i>/Å</b> | <b><i>b</i>/Å</b> | <b><i>c</i>/Å</b> | <b><math>\beta</math>/°</b> | <b><i>V</i>/ Å<sup>3</sup></b> | <b><i>Rp/Rwp</i>(%)</b> |
| 24.8                                                                              | 15.5978(15)       | 5.2583(21)        | 6.3211(35)        | 106.124(8)                  | 498.050(2)                     | 5.68/7.55               |
| 28.4                                                                              | 15.4236(22)       | 5.2431(53)        | 6.2856(26)        | 105.985(5)                  | 488.649(2)                     | 6.52/7.88               |
| 32.1                                                                              | 15.3629(24)       | 5.2314(27)        | 6.2398(35)        | 105.841(3)                  | 482.451(7)                     | 4.88/6.12               |
| 36.7                                                                              | 15.2915(25)       | 5.2222(16)        | 6.2058(23)        | 105.691(5)                  | 477.108(8)                     | 5.13/6.33               |
| 38.9                                                                              | 15.1256(27)       | 5.2093(22)        | 6.1877(45)        | 105.551(2)                  | 469.709(5)                     | 5.44/7.04               |
| 42.7                                                                              | 14.9942(25)       | 5.2025(17)        | 6.1742(15)        | 105.328(1)                  | 464.506(4)                     | 4.32/5.16               |
| 45.3                                                                              | 14.8653(27)       | 5.1967(22)        | 6.1549(16)        | 105.162(2)                  | 458.923(2)                     | 3.55/4.67               |
| 47.3                                                                              | 14.7534(32)       | 5.1923(41)        | 6.1327(18)        | 104.986(8)                  | 453.821(2)                     | 2.14/3.23               |
| 50.7                                                                              | 14.5781(12)       | 5.1797(16)        | 6.1227(31)        | 104.694(9)                  | 447.207(3)                     | 2.33/3.68               |
| 55.1                                                                              | 14.3321(22)       | 5.1454(34)        | 6.1044(54)        | 104.254(7)                  | 436.315(1)                     | 2.55/3.59               |
| 60.5                                                                              | 13.8806(13)       | 5.0771(25)        | 6.0786(18)        | 103.633(3)                  | 416.318(7)                     | 2.22/3.49               |
| <b>Phase IV (<i>C/2m</i>) of Bi<sub>2</sub>Se<sub>2</sub>Te (Le Bail fitting)</b> |                   |                   |                   |                             |                                |                         |
| 26.8                                                                              | 15.7369(21)       | 5.2770(3)         | 6.3990(34)        | 105.356(5)                  | 512.425(3)                     | 4.58/5.63               |
| 30.6                                                                              | 15.4421(24)       | 5.1861(31)        | 6.2915(25)        | 105.241(2)                  | 486.163(2)                     | 4.12/5.27               |
| 32.5                                                                              | 15.1915(34)       | 5.0359(11)        | 6.0942(34)        | 105.115(3)                  | 450.093(8)                     | 3.55/4.21               |
| 36.3                                                                              | 14.7858(13)       | 4.9031(21)        | 5.9465(22)        | 104.809(8)                  | 416.779(9)                     | 2.66/3.59               |
| 37.8                                                                              | 14.6585(22)       | 4.8014(41)        | 5.8500(32)        | 104.685(8)                  | 398.280(5)                     | 2.45/3.54               |
| 41.3                                                                              | 14.4569(37)       | 4.7261(12)        | 5.7838(18)        | 104.482(1)                  | 382.625(6)                     | 2.59/3.25               |
| 46.8                                                                              | 14.2985(34)       | 4.6126(22)        | 5.7193(19)        | 104.256(3)                  | 365.593(2)                     | 2.42/3.27               |
| 49.3                                                                              | 14.1394(28)       | 4.5074(15)        | 5.6626(9)         | 104.210(6)                  | 349.851(5)                     | 3.11/4.33               |
| 52                                                                                | 14.0234(16)       | 4.4278(34)        | 5.6079(12)        | 104.185(9)                  | 337.600(7)                     | 3.05/4.18               |
| 55.9                                                                              | 13.8842(13)       | 4.3410(18)        | 5.5516(32)        | 104.056(5)                  | 324.590(3)                     | 2.58/3.31               |
| 61.5                                                                              | 13.7192(17)       | 4.2456(13)        | 5.5027(25)        | 103.987(2)                  | 311.009(1)                     | 2.66/3.78               |
| 66.3                                                                              | 13.5562(12)       | 4.1258(12)        | 5.4568(47)        | 103.882(5)                  | 296.285(4)                     | 2.71/3.45               |
